# Supplementary material for: A Data Element-Function Conceptual Model for Data Quality Checks
Source: PubMed Central journal article supplement (PMC6484368; doi:10.5334/egems.289), 2019-04-23

## List of Supplemental Text, Tables and Figures

- Text: Results of additional OHDSI DQ checks
- Table S1: Allowable terms for domain descriptions of additional OHDSI DQ check constructs
- Figure S1: Horizontal bar charts of the percentage of DQ checks specific to OHDSI represented by corresponding DQ harmonization categories
- Figure S2: Horizontal bar charts of the percentage of DQ checks specific to CESR represented by corresponding DQ harmonization categories
- Figure S3: Heat map of the additional DQ check domains specific to OHDSI

**Text:** Results of additional OHDSI DQ checks

As a supplemental comparison, the additional 67 DQ checks for OHDSI were manually mapped to suggested domains (**Supplemental Material, Table S1**) and are summarized in a heat map (**Supplemental Material, Figure S3**). These DQ checks are generally more targeted than the other 172 OHDSI DQ checks by providing more actionable evaluations (e.g., meeting a set count or threshold). The most common data element domains were Internal ID (15; 22 percent of the DQ checks), Persons (13; 19 percent), Medication (6; 9 percent), Age (5; 7 percent), and Records (5; 7 percent). The most common function domains were Count (18; 27 percent), Invalid (17; 25 percent), Threshold (14; 21 percent), and Percentage (10; 15 percent). The most common pairings between data element domains and function domains were Internal ID-Count (9; 13 percent), Persons-Percentage (7; 10 percent), and Internal ID-Invalid (4; 6 percent).

**Table S1:** Allowable terms for domain descriptions of additional OHDSI data quality check constructs\*

| <b>Domain</b>              | <b>Domain Definition</b>                                                                                                               | <b>Count of Checks in Domain</b> |
|----------------------------|----------------------------------------------------------------------------------------------------------------------------------------|----------------------------------|
| <i>Data Elements (DEs)</i> |                                                                                                                                        |                                  |
| Age                        | DEs related to age-specific variables (e.g., specific to already calculated age values)                                                | 5                                |
| Birth                      | DEs related to birth-specific variables (e.g., specific to date-oriented values)                                                       | 2                                |
| Condition                  | DEs related to condition-specific variables                                                                                            | 3                                |
| Death                      | DEs related to death-specific variables                                                                                                | 3                                |
| Ethnicity                  | DEs related to ethnicity-specific variables                                                                                            | 1                                |
| Insurance                  | DEs related to insurance-specific variables                                                                                            | 1                                |
| Internal ID                | DEs defined by internally utilized constructions                                                                                       | 15                               |
| Lab                        | DEs related to lab-specific variables                                                                                                  | 1                                |
| Medication                 | DEs related to medication-specific variables                                                                                           | 6                                |
| Monthly Trend              | DEs that are the examination of a change when comparing months                                                                         | 2                                |
| Persons                    | DEs that examines only persons (i.e., patients)                                                                                        | 13                               |
| Procedure                  | DEs related to procedure-specific variables                                                                                            | 1                                |
| Provider                   | DEs related to provider-specific variables                                                                                             | 3                                |
| Race                       | DEs related to race-specific variables                                                                                                 | 1                                |
| Records                    | DEs that refer to rows in a particular table (not necessarily specified, such as persons or visits)                                    | 5                                |
| Visit                      | DEs that examines visit-record related variables                                                                                       | 3                                |
| Vital                      | DEs related to vital-specific variables (e.g., weight)                                                                                 | 2                                |
| <i>Functions</i>           |                                                                                                                                        |                                  |
| Count                      | Measures the count of DE relative to a certain specification (e.g., count of distinct concepts)                                        | 18                               |
| Density                    | Examines the concentration of a particular DE within a target DE (e.g., number of patients per provider specialty)                     | 2                                |
| Invalid                    | Examines if a particular specification is appropriate for a target DE (e.g., concept from a specific vocabulary)                       | 17                               |
| Mapping                    | Examines if a DE has an appropriate correspondence for a particular specification                                                      | 1                                |
| Missing                    | Measures the availability of a DE given some specification                                                                             | 1                                |
| Percentage                 | Measures the percentage of a DE given some specification                                                                               | 10                               |
| Ratio                      | Measures whether or not a target DE relative to another DE fits a specific comparison (e.g., number of patients to number of provider) | 4                                |
| Threshold                  | Measures DE relative to an imposed cutoff (e.g., age < 0)                                                                              | 14                               |

\*Because these data quality checks were examined as supplemental material and did not have the NLP methodology applied to them, there is no column listing possible terms or a count of unique terms.

**Figure S1:** Horizontal bar charts of the percentage of DQ checks specific to OHDSI represented by corresponding DQ harmonization categories

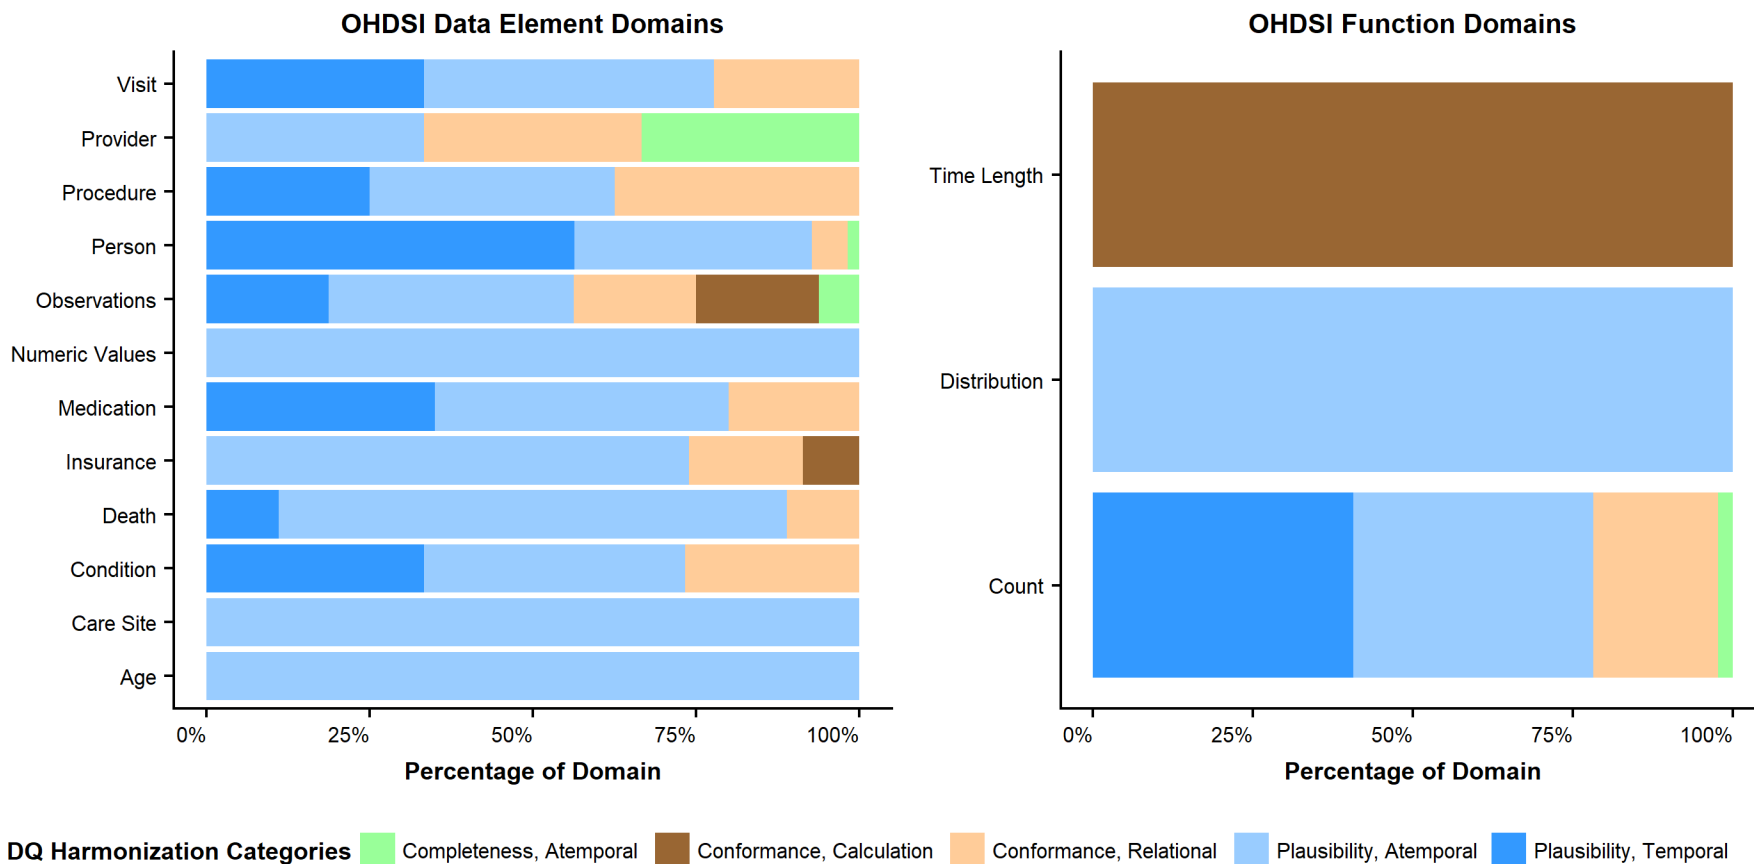

**Figure S2:** Horizontal bar charts of the percentage of DQ checks specific to CESR represented by corresponding DQ harmonization categories

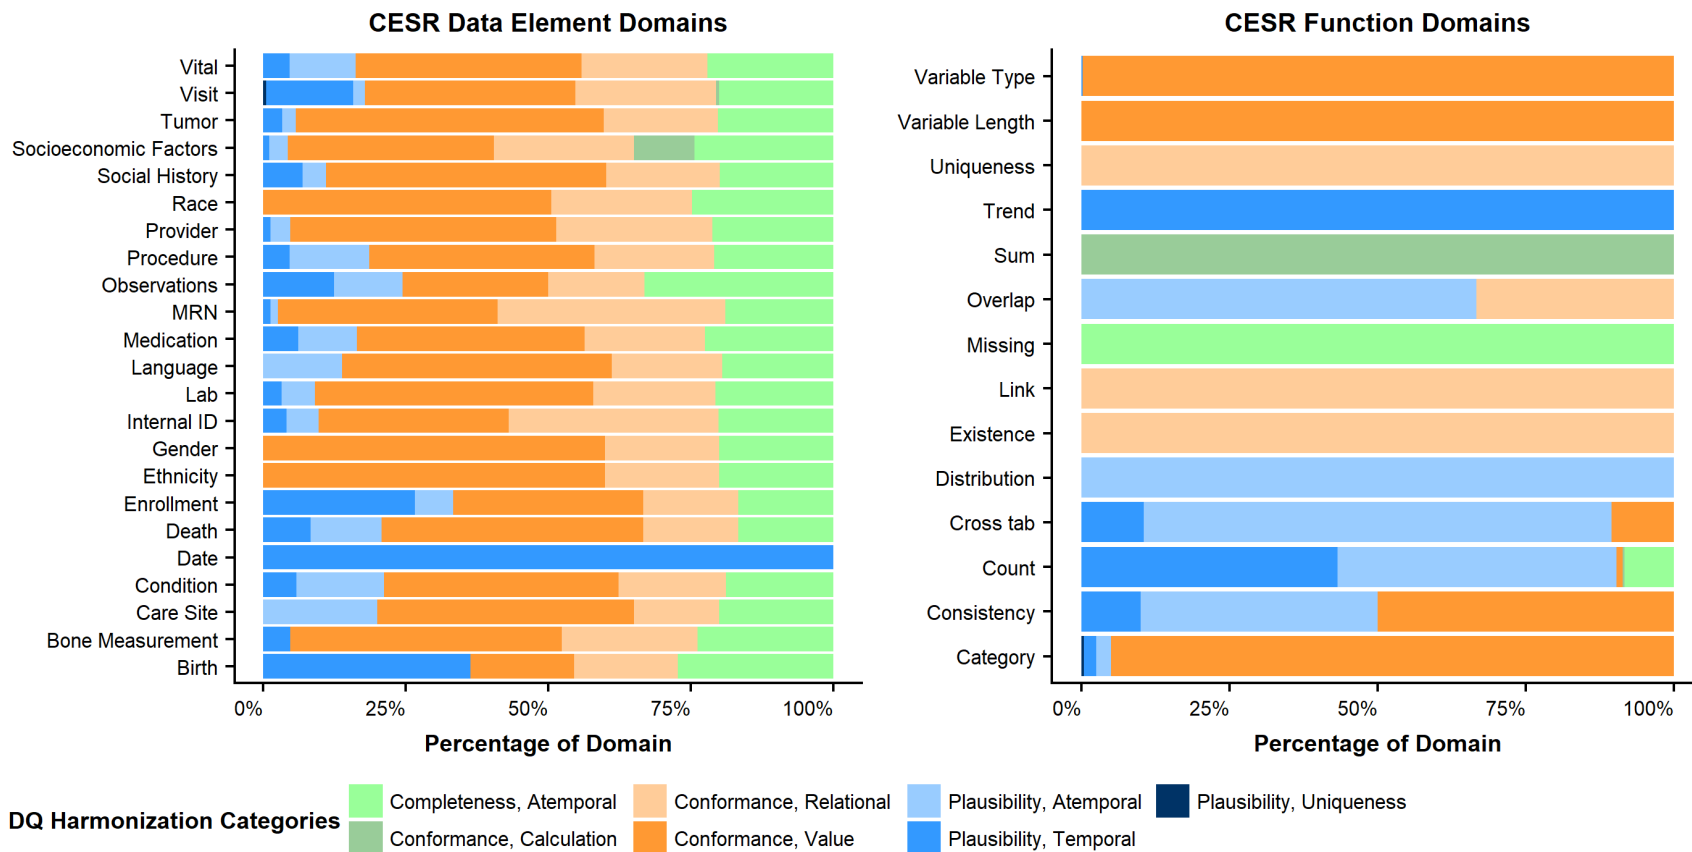

**Figure S3:** Heat map of the additional DQ check domains specific to OHDSI

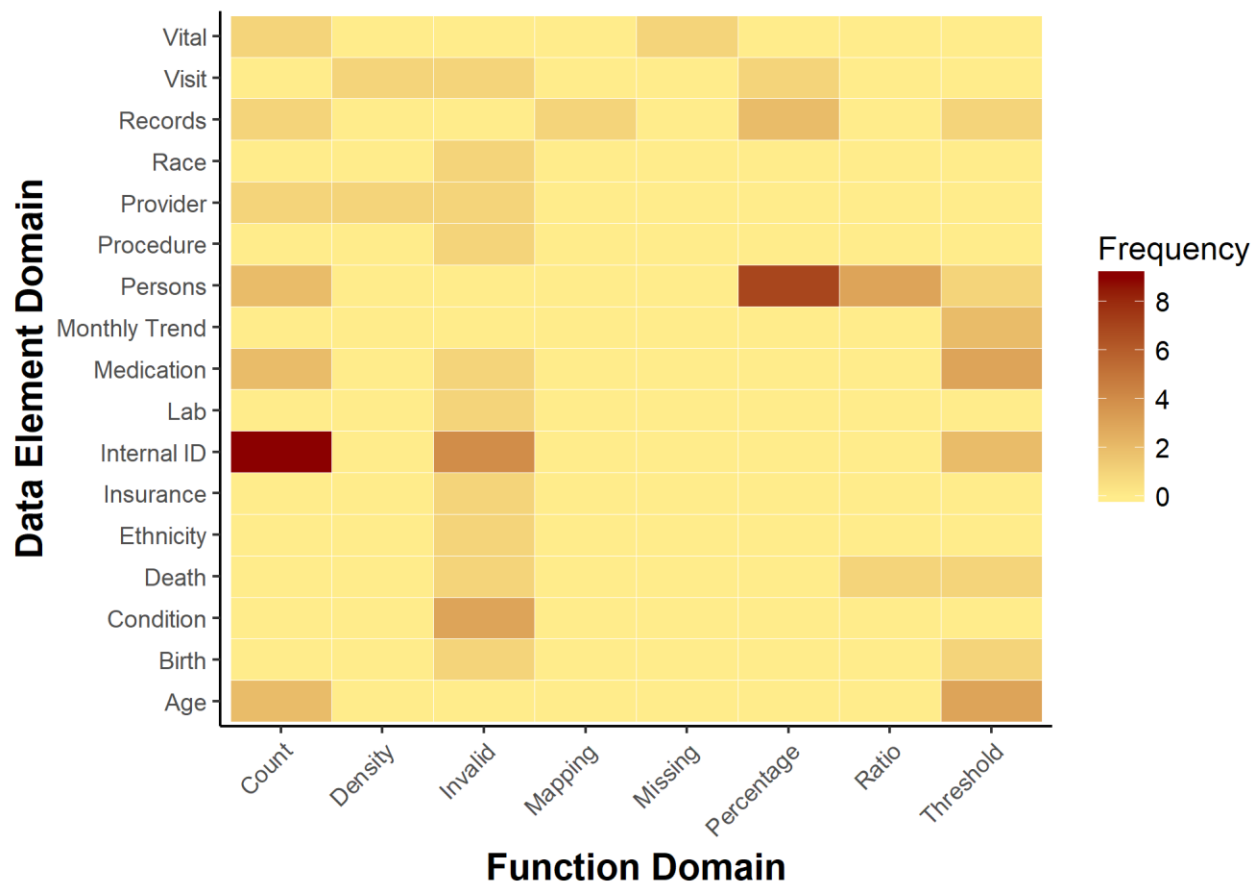

Supplement: egems-7-1-289-s1.pdf [file egems-7-1-289-s1.pdf]
